# Supplementary material
Source: PubMed Central journal article supplement (PMC7476027)
Supplement: jp0c03435_si_001.pdf [file jp0c03435_si_001.pdf]

## Supporting information for : Structural Modifications Controlling Membrane Raft Partitioning and Curvature in Human and Viral Proteins

Deniz Yurtsever<sup>1</sup> and Joseph Helmuth Lorent<sup>2,\*</sup>

<sup>1</sup>Theoretical Biology and Bioinformatics, Department of Biology, Utrecht University, Padualaan 8, NL-3584CH Utrecht, The Netherlands

<sup>2</sup>Membrane Biochemistry & Biophysics, Bijvoet Center for Biomolecular Research, Department of Chemistry, Utrecht University, Padualaan 8, NL-3584CH Utrecht, The Netherlands

\*Corresponding author, [j.h.f.lorent@uu.nl](mailto:j.h.f.lorent@uu.nl), Phone: +31302533966

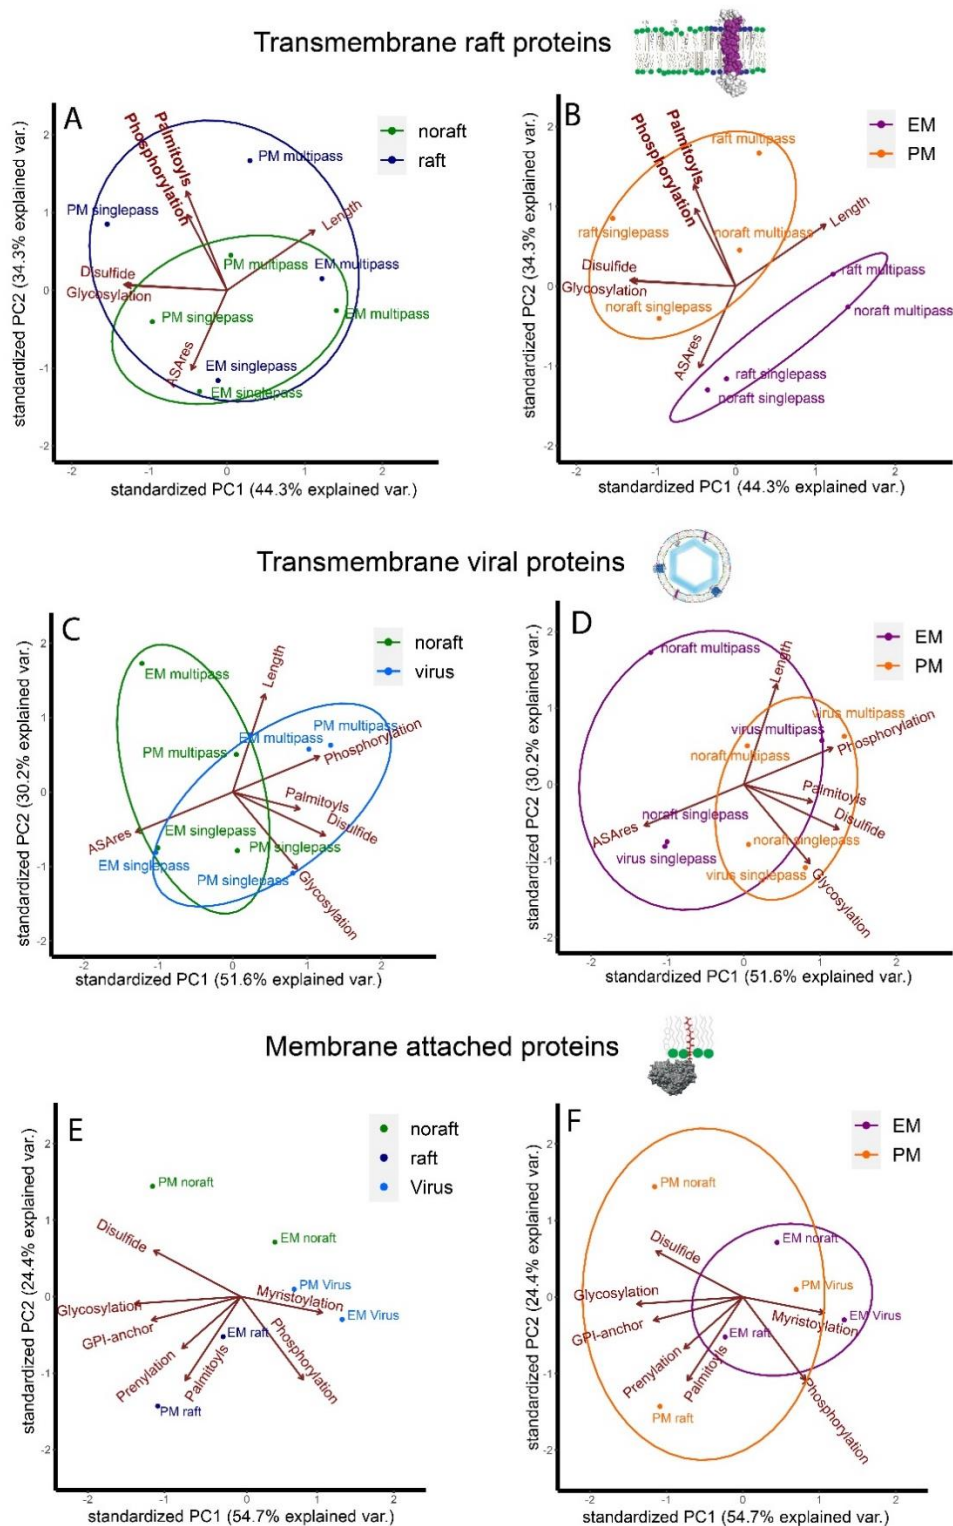

**Figure S1** Principal component analysis on the fraction of modified proteins in transmembrane (A,B,C,D) and attached membrane proteins (E,F), in raft versus non-raft (A,B) and virus versus non-raft (C,D) proteins. After PCA, proteins are colored upon protein type in the left column (green=non-raft, dark blue=raft and light blue=viral) or cellular localization in the right column (orange=plasma membrane and purple=endomembranes).

| Param1      | Param2      | Pcoef | pvalue    | Significance |
|-------------|-------------|-------|-----------|--------------|
| Fpalmitoyl  | MVS         | -0.96 | 0.0004879 | 1            |
| Fphosphoryl | MVS         | -0.58 | 0.1682139 | 0            |
| Fglycosyl   | MVS         | -0.51 | 0.2448335 | 0            |
| Fdisulfide  | MVS         | -0.86 | 0.0140998 | 1            |
| Length      | MVS         | -0.11 | 0.8094234 | 0            |
| ASares      | MVS         | 0.28  | 0.543704  | 0            |
| Fphosphoryl | Fpalmitoyl  | 0.54  | 0.2111766 | 0            |
| Fglycosyl   | Fpalmitoyl  | 0.67  | 0.1016425 | 0            |
| Fdisulfide  | Fpalmitoyl  | 0.83  | 0.0207802 | 1            |
| Length      | Fpalmitoyl  | -0.09 | 0.8484208 | 0            |
| ASares      | Fpalmitoyl  | -0.26 | 0.5660989 | 0            |
| Fglycosyl   | Fphosphoryl | 0.1   | 0.8257213 | 0            |
| Fdisulfide  | Fphosphoryl | 0.13  | 0.777667  | 0            |
| Length      | Fphosphoryl | -0.16 | 0.7250033 | 0            |
| ASares      | Fphosphoryl | -0.47 | 0.2925557 | 0            |
| Fdisulfide  | Fglycosyl   | 0.51  | 0.2437955 | 0            |
| Length      | Fglycosyl   | -0.13 | 0.7833978 | 0            |
| ASares      | Fglycosyl   | 0.24  | 0.5979512 | 0            |
| Length      | Fdisulfide  | 0.17  | 0.7086394 | 0            |
| ASares      | Fdisulfide  | 0.06  | 0.900748  | 0            |
| ASares      | Length      | 0.18  | 0.7015171 | 0            |

**Table S1** Correlation matrix of viral protein modifications corresponding to figure 6A in manuscript
